# Supplementary material
Source: PubMed Central journal article supplement (PMC10463558)
Supplement: NIHMS1926779-supplement-1.pdf [file NIHMS1926779-supplement-1.pdf]

Supplementary Material

### **International Advisory Committee on Clinical Trials in MS**

The International Advisory Committee on Clinical Trials in MS is a global body sponsored by the European Committee for Treatments and Research in MS and the National Multiple Sclerosis Society (USA). The Committee has been in existence for over 30 years and is composed of experts in clinical trials and clinical research in MS. The current membership of the committee can be accessed in the supplementary material. The committee is charged by the sponsoring organizations with providing perspective and guidance to the scientific and clinical community related to planning and implementation of clinical trials of MS therapies and allied topics. The Lublin-Reingold clinical course descriptors were originally developed by the committee in 1996 and subsequently revised in 2013.

Authors that are members of the committee are indicated in the author listing. The remaining members of the the committee during development of this paper is detailed below.

**Maria Pia Amato, MD**  
Department NEUROFARBA  
Section of Neurosciences  
University of Florence  
Italy

**Jeremy Chataway, MA, PhD**  
The National Hospital for Neurology and  
Neurosurgery  
Queen Square  
University College London Hospital  
United Kingdom

**Brenda Banwell, MD**  
The Children's Hospital of Philadelphia  
Perelman School of Medicine  
University of Pennsylvania  
United States

**Tanuja Chitnis, MD**  
Department of Neurology  
Brigham and Women's Hospital  
United States

**Frederik Barkhof, MD, PhD**  
Department of Radiology and Nuclear  
Medicine  
VU University Amsterdam  
Netherlands

**Giancarlo Comi, MD**  
University Vita-Salute San Raffaele  
Centro Sclerosi Multipla  
Italy

**Tobias Derfuss, MD**  
Departments of Neurology and Biomedicine  
University Basel  
Switzerland

**Marcia Finlayson, PhD**  
School of Rehabilitation Therapy  
Queens University  
Canada

**Myla Goldman, MD**  
Department of Neurology  
Virginia Commonwealth University  
United States

**Ari Green, MD**  
Department of Neurology  
University of California at San Francisco  
United States

**Kerstin Hellwig, MD**  
Department of Neurology  
St. Josef Hospital  
Ruhr University  
Germany

**Daphne Kos, PhD**  
Department of Rehabilitation Sciences  
University of Leuven  
Belgium

**Aaron Miller, MD**  
Corinne Goldsmith Dickinson Center for MS  
Mount Sinai School of Medicine  
United States

**Ellen Mowry, MD, MCR**  
Department of Neurology  
Johns Hopkins University  
United States

**Jiwon Oh, MD, PhD**  
Department of Neurology/Medicine  
St. Michaels Hospital, Toronto  
Canada

**Amber Salter, PhD**  
Statistical Planning and Analysis  
University of Texas Southwestern Medical  
Center  
United States

**Maria Pia Sormani, PhD**  
Unit of Biostatistics  
Health Sciences Department (DISSAL)  
University of Genoa  
Italy

**Mar Tintore, MD**  
Multiple Sclerosis Centre of Catalonia  
Vall d'Hebron University Hospital  
Spain

**Helen Tremlett, PhD**  
Faculty of Medicine (Neurology),  
University of British Columbia  
Canada

**Maria Trojano, MD**  
Department of Neuroscience and Sense  
Organs  
University of Bari  
Italy

**Anneke van der Walt, PhD**  
Department of Neuroscience  
Central Clinical School  
Monash University  
Australia

**Sandra Vukusic, MD, PhD**  
Service de Neurologie A et  
Fondation EDMUS pour la SEP  
Hôpital Neurologique Pierre Werthemier –  
GHE  
France

**Emmaunelle Waubant, MD, PhD**  
Department of Neurology  
University of California, San Francisco  
United States
